# Supplementary material for: Mesenchymal/Stromal Gene Expression Signature Relates to Basal-Like Breast Cancers, Identifies Bone Metastasis and Predicts Resistance to Therapies
Source: PubMed Central journal article supplement (PMC2994727; doi:10.1371/journal.pone.0014131), 2010-11-30
Supplement: pone.0014131.s001.pdf [file pone.0014131.s001.pdf]

| Position | Unigene   | GeneBank  | Description                                               | Gene Symbol                                                                                                                                            | A17 cell-1 | BB1 cell-1 | sB7 cell | A17 cell-2 | BB1 cell-2 | Spontaneous tumor | MSCs-1 | MSCs-2 | MSCs-3 | A17 tumors | BB1 tumors |
|----------|-----------|-----------|-----------------------------------------------------------|--------------------------------------------------------------------------------------------------------------------------------------------------------|------------|------------|----------|------------|------------|-------------------|--------|--------|--------|------------|------------|
| 1        | Mm.207354 | NM_011076 | ATP-binding cassette, sub-family B (MDR/TAP), member 1A   | Abcb1a                                                                                                                                                 | 0.16       | 0.21       | 0.21     | 0.14       | 0.2        | 0.2               | 0.21   | 0.18   | 0.21   | 0.19       | 0.28       |
| 2        | Mm.146649 | NM_011075 | ATP-binding cassette, sub-family B (MDR/TAP), member 1B   | Abcb1b                                                                                                                                                 | 0.17       | 0.14       | 0.22     | 0.13       | 0.13       | 0.1               | 0.19   | 0.17   | 0.15   | 0.15       | 0.15       |
| 3        | Mm.6645   | NM_009652 | Thymoma viral proto-oncogene 1                            | Akt1                                                                                                                                                   | 0.22       | 0.21       | 0.27     | 0.2        | 0.36       | 0.14              | 0.38   | 0.31   | 0.39   | 0.23       | 0.24       |
| 4        | Mm.209903 | NM_009715 | Activating transcription factor 2                         | Atf2                                                                                                                                                   | 0.24       | 0.18       | 0.21     | 0.32       | 0.33       | 0.24              | 0.42   | 0.3    | 0.3    | 0.27       | 0.32       |
| 5        | Mm.19904  | NM_007527 | Bcl2-associated X protein                                 | Bax                                                                                                                                                    | 0.25       | 0.18       | 0.19     | 0.18       | 0.25       | 0.21              | 0.3    | 0.29   | 0.27   | 0.3        | 0.34       |
| 6        | Mm.257460 | NM_009741 | B-cell leukemia/lymphoma 2                                | Bcl2                                                                                                                                                   | 0.69       | 0.98       | 0.78     | 0.97       | 0.8        | 0.86              | 0.83   | 0.56   | 0.77   | 0.85       | 1          |
| 7        | Mm.378888 | NM_007536 | B-cell leukemia/lymphoma 2 related protein A1d            | Bcl2a1d                                                                                                                                                | 0.25       | 0.38       | 0.23     | 0.22       | 0.21       | 0.35              | 0.46   | 0.2    | 0.22   | 0.89       | 0.53       |
| 8        | Mm.238213 | NM_009743 | RIKEN cDNA A630035D09 gene                                | Bcl2l1                                                                                                                                                 | 0.27       | 0.39       | 0.23     | 0.19       | 0.23       | 0.15              | 0.26   | 0.18   | 0.19   | 0.17       | 0.21       |
| 9        | Mm.6898   | NM_008670 | Baculoviral IAP repeat-containing 1a                      | Birc1a                                                                                                                                                 | 0.19       | 0.21       | 0.26     | 0.19       | 0.19       | 0.19              | 0.26   | 0.23   | 0.24   | 0.2        | 0.28       |
| 10       | Mm.89961  | NM_010872 | Baculoviral IAP repeat-containing 1b                      | Birc1b                                                                                                                                                 | 0.18       | 0.2        | 0.25     | 0.22       | 0.24       | 0.24              | 0.31   | 0.24   | 0.32   | 0.27       | 0.36       |
| 11       | Mm.290476 | NM_010870 | Baculoviral IAP repeat-containing 1e                      | Birc1e                                                                                                                                                 | 0.2        | 0.2        | 0.22     | 0.22       | 0.21       | 0.19              | 0.31   | 0.23   | 0.23   | 0.2        | 0.25       |
| 12       | Mm.2026   | NM_007464 | Baculoviral IAP repeat-containing 3                       | Birc3                                                                                                                                                  | 0.21       | 0.15       | 0.2      | 0.17       | 0.18       | 0.18              | 0.34   | 0.21   | 0.24   | 0.24       | 0.22       |
| 13       | Mm.335659 | NM_007465 | Baculoviral IAP repeat-containing 2                       | Birc2                                                                                                                                                  | 0.3        | 0.26       | 0.27     | 0.42       | 0.6        | 0.7               | 0.79   | 0.43   | 0.6    | 0.92       | 0.97       |
| 14       | Mm.103205 | NM_007553 | Bone morphogenetic protein 2                              | Bmp2                                                                                                                                                   | 0.28       | 0.37       | 0.23     | 0.23       | 0.23       | 0.2               | 0.32   | 0.21   | 0.22   | 0.19       | 0.24       |
| 15       | Mm.6813   | NM_007554 | Bone morphogenetic protein 4                              | Bmp4                                                                                                                                                   | 0.36       | 0.36       | 0.23     | 0.33       | 0.22       | 0.22              | 0.36   | 0.21   | 0.21   | 0.3        | 0.25       |
| 16       | Mm.244975 | NM_009764 | Breast cancer 1                                           | Brc1                                                                                                                                                   | 0.44       | 0.5        | 0.37     | 0.27       | 0.39       | 0.33              | 0.44   | 0.28   | 0.33   | 0.26       | 0.33       |
| 17       | Mm.273049 | NM_007631 | Cyclin D1                                                 | Ccnd1                                                                                                                                                  | 0.73       | 0.98       | 0.76     | 1.13       | 1.11       | 0.96              | 1.13   | 0.79   | 1.02   | 0.99       | 1.04       |
| 18       | Mm.111326 | NM_016756 | Cyclin-dependent kinase 2                                 | Cdk2                                                                                                                                                   | 0.23       | 0.21       | 0.3      | 0.21       | 0.25       | 0.3               | 0.35   | 0.33   | 0.31   | 0.35       | 0.43       |
| 19       | Mm.195663 | NM_007669 | Cyclin-dependent kinase inhibitor 1A (P21)                | Cdkn1a                                                                                                                                                 | 0.54       | 0.99       | 0.33     | 0.47       | 0.62       | 0.74              | 0.91   | 0.61   | 0.99   | 0.79       | 0.91       |
| 20       | Mm.2958   | NM_009875 | Cyclin-dependent kinase inhibitor 1B (P27)                | Cdkn1b                                                                                                                                                 | 0.35       | 0.31       | 0.36     | 0.5        | 0.39       | 0.33              | 0.47   | 0.3    | 0.4    | 0.29       | 0.46       |
| 21       | Mm.168789 | NM_009876 | Cyclin-dependent kinase inhibitor 1C (P57)                | Cdkn1c                                                                                                                                                 | 0.27       | 0.22       | 0.22     | 0.23       | 0.25       | 0.27              | 0.39   | 0.27   | 0.29   | 0.26       | 0.35       |
| 22       | Mm.4733   | NM_009877 | Cyclin-dependent kinase inhibitor 2A                      | Cdkn2a                                                                                                                                                 | 0.97       | 1.04       | 0.72     | 0.54       | 0.72       | 0.91              | 1.05   | 0.37   | 0.91   | 0.92       | 1.02       |
| 23       | Mm.269426 | NM_007670 | Cyclin-dependent kinase inhibitor 2B (p15, inhibits CDK4) | Cdkn2b                                                                                                                                                 | 1.05       | 1.16       | 1.27     | 1.07       | 1.11       | 0.96              | 1.21   | 0.8    | 1      | 0.93       | 1.01       |
| 24       | Mm.1912   | NM_007671 | Cyclin-dependent kinase inhibitor 2C (p18, inhibits CDK4) | Cdkn2c                                                                                                                                                 | 1          | 0.98       | 0.51     | 0.89       | 0.95       | 0.97              | 1.18   | 0.65   | 0.91   | 0.93       | 1.02       |
| 25       | Mm.29020  | NM_009878 | Cyclin-dependent kinase inhibitor 2D (p19, inhibits CDK4) | Cdkn2d                                                                                                                                                 | 0.21       | 0.17       | 0.24     | 0.23       | 0.17       | 0.18              | 0.32   | 0.26   | 0.25   | 0.23       | 0.28       |
| 26       | Mm.277735 | NM_007742 | Procollagen, type I, alpha 1                              | Col1a1                                                                                                                                                 | 0.25       | 0.21       | 0.23     | 1.19       | 0.28       | 0.65              | 1.19   | 1.06   | 1.02   | 1          | 0.9        |
| 27       | Mm.268737 | NM_009972 | Casein beta                                               | Csn2                                                                                                                                                   | 0.2        | 0.16       | 0.21     | 0.25       | 0.21       | 0.19              | 0.36   | 0.29   | 0.27   | 0.24       | 0.26       |
| 28       | Mm.231395 | NM_009983 | Cathepsin D                                               | Ctsd                                                                                                                                                   | 0.75       | 0.32       | 0.41     | 0.61       | 0.55       | 0.88              | 1.01   | 0.56   | 0.71   | 1          | 0.95       |
| 29       | Mm.766    | NM_008599 | Chemokine (C-X-C motif) ligand 9                          | Cxcl9                                                                                                                                                  | 0.24       | 0.2        | 0.19     | 0.23       | 0.21       | 0.25              | 0.37   | 0.26   | 0.27   | 0.22       | 0.31       |
| 30       | Mm.239041 | NM_013642 | Dual specificity phosphatase 1                            | Dusp1                                                                                                                                                  | 0.76       | 0.51       | 0.33     | 0.84       | 0.29       | 0.35              | 1.21   | 0.9    | 0.99   | 0.85       | 0.45       |
| 31       | Mm.14543  | NM_010104 | Endothelin 1                                              | Edn1                                                                                                                                                   | 0.29       | 0.41       | 0.27     | 0.25       | 0.23       | 0.21              | 0.44   | 0.24   | 0.26   | 0.2        | 0.22       |
| 32       | Mm.8534   | NM_007912 | RIKEN cDNA E230015J15 gene                                | Egfr                                                                                                                                                   | 0.27       | 0.35       | 0.23     | 0.26       | 0.21       | 0.25              | 0.83   | 0.29   | 0.42   | 0.21       | 0.27       |
| 33       | Mm.181959 | NM_007913 | Early growth response 1                                   | Egr1                                                                                                                                                   | 0.88       | 0.32       | 0.47     | 1.25       | 0.57       | 0.25              | 1.14   | 0.79   | 0.45   | 0.56       | 0.41       |
| 34       | Mm.250256 | NM_015744 | Ectonucleotide pyrophosphatase/phosphodiesterase 2        | Enpp2                                                                                                                                                  | 0.32       | 0.16       | 0.22     | 0.35       | 0.2        | 0.18              | 0.38   | 0.3    | 0.33   | 1          | 0.27       |
| 35       | Mm.349116 | NM_007942 | Erythropoietin                                            | Epo                                                                                                                                                    | 0.28       | 0.19       | 0.24     | 0.28       | 0.26       | 0.21              | 0.43   | 0.33   | 0.32   | 0.27       | 0.29       |
| 36       | Mm.193099 | NM_010233 | Fibronectin 1                                             | <td>1.02</td> <td>1.01</td> <td>0.87</td> <td>1.26</td> <td>1.11</td> <td>0.84</td> <td>1.19</td> <td>0.93</td> <td>1.02</td> <td>1</td> <td>0.91</td> | 1.02       | 1.01       | 0.87     | 1.26       | 1.11       | 0.84              | 1.19   | 0.93   | 1.02   | 1          | 0.91       |
| 37       | Mm.269137 | NM_016770 | Folate hydrolase                                          | Folh1                                                                                                                                                  | 0.28       | 0.24       | 0.2      | 0.24       | 0.23       | 0.21              | 0.35   | 0.3    | 0.27   | 0.24       | 0.23       |
| 38       | Mm.246513 | NM_010234 | FBJ osteosarcoma related oncogene                         | Fos                                                                                                                                                    | 0.36       | 0.48       | 0.3      | 0.25       | 0.29       | 0.2               | 0.44   | 0.27   | 0.28   | 0.2        | 0.26       |
| 39       | Mm.6215   | NM_010235 | Fos-like antigen 1                                        | Fos1                                                                                                                                                   | 0.72       | 0.63       | 0.32     | 0.3        | 0.33       | 0.58              | 0.6    | 0.35   | 0.53   | 0.38       | 0.76       |
| 40       | Mm.938    | NM_010446 | Forkhead box A2                                           | Foxa2                                                                                                                                                  | 0.34       | 0.34       | 0.21     | 0.18       | 0.21       | 0.2               | 0.31   | 0.23   | 0.23   | 0.16       | 0.19       |
| 41       | Mm.1236   | NM_007836 | Growth arrest and DNA-damage-inducible 45 alpha           | Gadd45a                                                                                                                                                | 0.41       | 0.32       | 0.26     | 0.29       | 0.34       | 0.5               | 0.44   | 0.31   | 0.65   | 0.63       | 0.8        |
| 42       | Mm.254493 | NM_020259 | Hedgehog-interacting protein                              | Hhip                                                                                                                                                   | 0.35       | 0.34       | 0.34     | 0.26       | 0.29       | 0.25              | 0.41   | 0.39   | 0.35   | 0.29       | 0.36       |
| 43       | Mm.3879   | NM_010431 | Hypoxia inducible factor 1, alpha subunit                 | Hif1a                                                                                                                                                  | 0.74       | 0.49       | 0.52     | 0.56       | 0.9        | 0.46              | 1.13   | 0.84   | 1.01   | 0.89       | 1          |
| 44       | Mm.196605 | NM_010438 | Hexokinase 1                                              | Hk1                                                                                                                                                    | 0.36       | 0.26       | 0.28     | 0.45       | 0.48       | 0.29              | 0.48   | 0.38   | 0.43   | 0.28       | 0.44       |
| 45       | Mm.276389 | NM_010442 | Heme oxygenase (decycling) 1                              | Hmox1                                                                                                                                                  | 0.67       | 0.33       | 0.25     | 0.32       | 0.27       | 0.4               | 0.91   | 0.65   | 0.88   | 0.39       | 0.43       |
| 46       | Mm.347444 | NM_008296 | Heat shock factor 1                                       | Hsf1                                                                                                                                                   | 0.32       | 0.35       | 0.22     | 0.27       | 0.27       | 0.22              | 0.39   | 0.31   | 0.32   | 0.21       | 0.26       |
| 47       | Mm.239865 | NM_008300 | Heat shock protein 4                                      | Hspa4                                                                                                                                                  | 0.92       | 1.13       | 0.6      | 0.51       | 1.01       | 0.47              | 1.16   | 0.85   | 0.93   | 0.41       | 0.53       |
| 48       | Mm.330160 | NM_022310 | Heat shock 70kD protein 5 (glucose-regulated protein)     | Hspa5                                                                                                                                                  | 1.03       | 1.04       | 0.75     | 0.44       | 0.96       | 1.02              | 1.18   | 0.91   | 0.96   | 0.94       | 0.98       |
| 49       | Mm.13849  | NM_013560 | Heat shock protein 1                                      | Hspb1                                                                                                                                                  | 0.28       | 0.22       | 0.26     | 0.24       | 0.25       | 0.39              | 0.39   | 0.32   | 0.45   | 0.4        | 0.69       |
| 50       | Mm.1980   | NM_024441 | Heat shock protein 2                                      | Hspb2                                                                                                                                                  | 0.98       | 1.16       | 1.42     | 1.26       | 1.12       | 0.98              | 1.07   | 0.93   | 1.02   | 0.98       | 1.02       |
| 51       | Mm.371565 | NM_010480 | Heat shock protein 1, alpha                               | Hsp90aa1                                                                                                                                               | 0.98       | 1.2        | 1.24     | 0.72       | 1.11       | 0.87              | 0.96   | 0.93   | 1.02   | 1          | 1.01       |
| 52       | Mm.90364  | NM_010493 | H1 histone family, member 0                               | Icam1                                                                                                                                                  | 0.24       | 0.23       | 0.25     | 0.23       | 0.28       | 0.22              | 0.32   | 0.3    | 0.29   | 0.21       | 0.28       |
| 53       | Mm.34871  | NM_010496 | Inhibitor of DNA binding 2                                | Id2                                                                                                                                                    | 1.06       | 1.19       | 1.19     | 1.05       | 1.12       | 1                 | 1.21   | 0.9    | 1.02   | 0.98       | 1.05       |
| 54       | Mm.29254  | NM_008343 | Insulin-like growth factor binding protein 3              | Igfbp3                                                                                                                                                 | 0.28       | 0.39       | 0.25     | 0.25       | 0.26       | 0.28              | 0.37   | 0.28   | 0.3    | 0.27       | 0.32       |
| 55       | Mm.14190  | NM_008366 | Interleukin 2                                             | Il2                                                                                                                                                    | 0.42       | 0.39       | 0.26     | 0.2        | 0.24       | 0.19              | 0.28   | 0.23   | 0.25   | 0.17       | 0.21       |
| 56       | Mm.276360 | NM_021283 | Interleukin 4                                             | Il4                                                                                                                                                    | 0.26       | 0.3        | 0.21     | 0.18       | 0.21       | 0.2               | 0.31   | 0.23   | 0.25   | 0.17       | 0.21       |
| 57       | Mm.233802 | NM_010557 | Interleukin 4 receptor, alpha                             | Il4ra                                                                                                                                                  | 0.17       | 0.16       | 0.21     | 0.16       | 0.17       | 0.14              | 0.41   | 0.21   | 0.45   | 0.2        | 0.22       |
| 58       | Mm.105218 | NM_008390 | Interferon regulatory factor 1                            | Irf1                                                                                                                                                   | 0.3        | 0.49       | 0.37     | 0.38       | 0.4        | 0.76              | 0.33   | 0.27   | 0.39   | 0.98       | 0.91       |
| 59       | Mm.275071 | NM_010591 | Jun oncogene                                              | Jun                                                                                                                                                    | 0.27       | 0.22       | 0.26     | 0.2        | 0.24       | 0.21              | 0.28   | 0.26   | 0.27   | 0.2        | 0.27       |
| 60       | Mm.245297 | NM_008455 | Kallikrein B, plasma 1                                    | Klkb1                                                                                                                                                  | 0.24       | 0.2        | 0.2      | 0.22       | 0.23       | 0.19              | 0.26   | 0.26   | 0.27   | 0.17       | 0.24       |
| 61       | Mm.87787  | NM_010735 | Lymphotoxin A                                             | Lta                                                                                                                                                    | 0.25       | 0.37       | 0.28     | 0.24       | 0.24       | 0.23              | 0.27   | 0.25   | 0.27   | 0.18       | 0.26       |
| 62       | Mm.1639   | NM_008562 | Myeloid cell leukemia sequence 1                          | Mcl1                                                                                                                                                   | 0.81       | 0.55       | 0.32     | 0.32       | 0.51       | 0.36              | 0.71   | 0.45   | 0.57   | 0.53       | 0.52       |
| 63       | Mm.22670  | NM_010786 | Transformed mouse 3T3 cell double minute 2                | Mdm2                                                                                                                                                   | 0.4        | 0.38       | 0.23     | 0.18       | 0.23       | 0.16              | 0.25   | 0.22   | 0.3    | 0.15       | 0.22       |

|    |           |           |                                                                               |           |      |      |      |      |      |      |      |      |      |      |      |
|----|-----------|-----------|-------------------------------------------------------------------------------|-----------|------|------|------|------|------|------|------|------|------|------|------|
| 64 | Mm.14126  | NM_019471 | Matrix metalloproteinase 10                                                   | Mmp10     | 0.23 | 0.32 | 0.18 | 0.15 | 0.18 | 0.21 | 0.24 | 0.19 | 0.25 | 0.57 | 0.21 |
| 65 | Mm.4825   | NM_010810 | Matrix metalloproteinase 7                                                    | Mmp7      | 0.15 | 0.16 | 0.2  | 0.12 | 0.15 | 0.13 | 0.18 | 0.16 | 0.22 | 0.19 | 0.21 |
| 66 | Mm.2444   | NM_010849 | Myelocytomatosis oncogene                                                     | Myc       | 0.23 | 0.15 | 0.21 | 0.22 | 0.19 | 0.16 | 0.23 | 0.22 | 0.25 | 0.17 | 0.29 |
| 67 | Mm.73682  | NM_022995 | Transmembrane, prostate androgen induced RNA                                  | Tmpai     | 0.46 | 0.39 | 0.32 | 0.28 | 0.36 | 0.59 | 0.41 | 0.36 | 0.64 | 0.46 | 0.74 |
| 68 | Mm.256765 | NM_008689 | Ubiquitin-conjugating enzyme E2D 3 (UBC4/5 homolog, yeast)                    | Nfkb1     | 0.42 | 0.23 | 0.22 | 0.17 | 0.21 | 0.16 | 0.26 | 0.33 | 0.23 | 0.16 | 0.22 |
| 69 | Mm.170515 | NM_010907 | Nuclear factor of kappa light chain gene enhancer in B-cells inhibitor, alpha | Nfkbia    | 0.35 | 0.39 | 0.23 | 0.18 | 0.21 | 0.18 | 0.27 | 0.24 | 0.22 | 0.18 | 0.22 |
| 70 | Mm.16730  | NM_010915 | Nerve growth factor, alpha                                                    | Klk1b4    | 0.24 | 0.31 | 0.21 | 0.17 | 0.2  | 0.18 | 0.22 | 0.19 | 0.19 | 0.15 | 0.2  |
| 71 | Mm.2893   | NM_010927 | Nitric oxide synthase 2, inducible, macrophage                                | Nos2      | 0.23 | 0.32 | 0.21 | 0.19 | 0.19 | 0.17 | 0.31 | 0.18 | 0.22 | 0.14 | 0.19 |
| 72 | Mm.12798  | NM_008829 | Progesterone receptor                                                         | Pgr       | 0.2  | 0.27 | 0.18 | 0.14 | 0.18 | 0.15 | 0.47 | 0.17 | 0.23 | 0.12 | 0.17 |
| 73 | Mm.3020   | NM_011146 | Peroxisome proliferator activated receptor gamma                              | Pparg     | 0.16 | 0.17 | 0.2  | 0.15 | 0.17 | 0.19 | 0.21 | 0.24 | 0.32 | 0.2  | 0.36 |
| 74 | Mm.228798 | NM_008957 | Patched homolog 1                                                             | Ptch1     | 0.2  | 0.16 | 0.21 | 0.17 | 0.23 | 0.13 | 0.2  | 0.18 | 0.21 | 0.15 | 0.25 |
| 75 | Mm.287037 | NM_008958 | Patched homolog 2                                                             | Ptch2     | 0.23 | 0.14 | 0.19 | 0.15 | 0.15 | 0.14 | 0.18 | 0.21 | 0.19 | 0.13 | 0.19 |
| 76 | Mm.292547 | NM_011198 | Prostaglandin-endoperoxide synthase 2                                         | Ptgs2     | 1.02 | 0.24 | 0.23 | 0.63 | 0.2  | 0.16 | 0.85 | 1.01 | 0.83 | 0.37 | 0.21 |
| 77 | Mm.260144 | NM_007376 | Pregnancy zone protein                                                        | Pzp       | 0.35 | 0.76 | 0.35 | 0.19 | 0.62 | 0.23 | 0.3  | 0.3  | 0.31 | 0.25 | 0.32 |
| 78 | Mm.21002  | NM_011400 | Solute carrier family 2 (facilitated glucose transporter), member 1           | Slc2a1    | 0.42 | 0.44 | 0.31 | 0.21 | 0.26 | 0.26 | 0.38 | 0.25 | 0.31 | 0.22 | 0.32 |
| 79 | Mm.332607 | NM_009327 | Transcription factor 1                                                        | Tcf1      | 0.31 | 0.55 | 0.28 | 0.18 | 0.48 | 0.65 | 0.33 | 0.24 | 0.49 | 0.33 | 0.99 |
| 80 | Mm.1293   | NM_013693 | Tumor necrosis factor                                                         | Tnf       | 0.22 | 0.31 | 0.22 | 0.16 | 0.21 | 0.19 | 0.26 | 0.19 | 0.22 | 0.14 | 0.21 |
| 81 | Mm.116683 | NM_009397 | Tumor necrosis factor, alpha-induced protein 3                                | Tnfaip3   | 0.18 | 0.18 | 0.21 | 0.11 | 0.14 | 0.13 | 0.19 | 0.17 | 0.21 | 0.17 | 0.22 |
| 82 | Mm.193430 | NM_020275 | Tumor necrosis factor receptor superfamily, member 10b                        | Tnfrsf10b | 0.21 | 0.15 | 0.19 | 0.12 | 0.15 | 0.1  | 0.16 | 0.2  | 0.2  | 0.13 | 0.17 |
| 83 | Mm.1626   | NM_007987 | Fas (TNF receptor superfamily member)                                         | Fas       | 0.2  | 0.15 | 0.19 | 0.15 | 0.14 | 0.12 | 0.18 | 0.19 | 0.22 | 0.17 | 0.17 |
| 84 | Mm.1062   | NM_009425 | Tumor necrosis factor (ligand) superfamily, member 10                         | Tnfsf10   | 0.22 | 0.23 | 0.18 | 0.15 | 0.18 | 0.19 | 0.19 | 0.21 | 0.19 | 0.16 | 0.28 |
| 85 | Mm.239514 | NM_009421 | Tnf receptor-associated factor 1                                              | Traf1     | 0.81 | 0.81 | 0.41 | 0.61 | 0.7  | 0.95 | 0.9  | 0.55 | 0.93 | 0.76 | 0.99 |
| 86 | Mm.37214  | NM_133977 | Transferrin                                                                   | Trf       | 0.37 | 1.27 | 1.4  | 0.25 | 1.12 | 1.04 | 1.14 | 0.3  | 0.6  | 1    | 1.06 |
| 87 | Mm.28683  | NM_011638 | Transferrin receptor                                                          | Tfrc      | 0.92 | 1.27 | 1.26 | 0.28 | 1.09 | 0.92 | 0.77 | 0.89 | 0.88 | 0.6  | 0.98 |
| 88 | Mm.248445 | NM_009546 | Tripartite motif protein 25                                                   | Trim25    | 0.38 | 0.4  | 0.35 | 0.87 | 0.8  | 0.6  | 1.09 | 0.55 | 0.95 | 0.45 | 0.88 |
| 89 | Mm.222    | NM_011640 | Transformation related protein 53                                             | Trp53     | 0.29 | 0.19 | 0.24 | 0.5  | 0.33 | 0.25 | 0.44 | 0.53 | 0.51 | 0.49 | 0.52 |
| 90 | Mm.76649  | NM_011693 | Vascular cell adhesion molecule 1                                             | Vcam1     | 0.22 | 0.15 | 0.18 | 0.15 | 0.15 | 0.21 | 0.36 | 0.25 | 0.41 | 0.81 | 0.3  |
| 91 | Mm.282184 | NM_009505 | Vascular endothelial growth factor A                                          | Vegfa     | 0.42 | 0.18 | 0.2  | 0.17 | 0.16 | 0.18 | 0.31 | 0.28 | 0.3  | 0.22 | 0.22 |
| 92 | Mm.35705  | NM_009517 | Wild-type p53-induced gene 1                                                  | Zmat3     | 0.33 | 0.28 | 0.21 | 0.2  | 0.22 | 0.25 | 0.26 | 0.26 | 0.35 | 0.22 | 0.3  |
| 93 | Mm.10222  | NM_018865 | WNT1 inducible signaling pathway protein 1                                    | Wisp1     | 0.28 | 0.3  | 0.21 | 0.19 | 0.22 | 0.25 | 0.25 | 0.22 | 0.26 | 0.22 | 0.3  |
| 94 | Mm.1123   | NM_021279 | Wingless-related MMTV integration site 1                                      | Wnt1      | 0.26 | 0.42 | 0.32 | 0.21 | 0.28 | 0.27 | 0.27 | 0.23 | 0.23 | 0.21 | 0.29 |
| 95 | Mm.33653  | NM_023653 | Wingless-related MMTV integration site 2                                      | Wnt2      | 0.39 | 0.41 | 0.35 | 0.27 | 0.3  | 0.3  | 0.35 | 0.32 | 0.28 | 0.23 | 0.32 |
| 96 | Mm.307022 | NM_019653 | WD repeat and SOCS box-containing 1                                           | Wsb1      | 0.81 | 0.51 | 0.42 | 0.36 | 0.46 | 0.43 | 0.81 | 0.53 | 0.71 | 0.58 | 0.52 |
