# Supplementary material for: Mesenchymal/Stromal Gene Expression Signature Relates to Basal-Like Breast Cancers, Identifies Bone Metastasis and Predicts Resistance to Therapies
Source: PubMed Central journal article supplement (PMC2994727; doi:10.1371/journal.pone.0014131), 2010-11-30
Supplement: pone.0014131.s003.pdf [file pone.0014131.s003.pdf]

| Description                                 | Number of samples | Accession number | Database                                                                                                          |
|---------------------------------------------|-------------------|------------------|-------------------------------------------------------------------------------------------------------------------|
| Prostate Cancer                             | 19                | E-GEOD-3325      | Arrayexpress project: <a href="http://www.ebi.ac.uk/microarray-as/ae/">http://www.ebi.ac.uk/microarray-as/ae/</a> |
| Bladder Cancer                              | 12                | E-GEOD-7476      | Arrayexpress project: <a href="http://www.ebi.ac.uk/microarray-as/ae/">http://www.ebi.ac.uk/microarray-as/ae/</a> |
| Breast Tumor vs. Normal Tissue              | 62                | E-GEOD-7904      | Arrayexpress project: <a href="http://www.ebi.ac.uk/microarray-as/ae/">http://www.ebi.ac.uk/microarray-as/ae/</a> |
| Breast Tumors                               | 129               | E-GEOD-5460      | Arrayexpress project: <a href="http://www.ebi.ac.uk/microarray-as/ae/">http://www.ebi.ac.uk/microarray-as/ae/</a> |
| MSC                                         | 11                | E-GEOD-9764      | Arrayexpress project: <a href="http://www.ebi.ac.uk/microarray-as/ae/">http://www.ebi.ac.uk/microarray-as/ae/</a> |
| Gastrointestinal Tumor                      | 32                | E-GEOD-8167      | Arrayexpress project: <a href="http://www.ebi.ac.uk/microarray-as/ae/">http://www.ebi.ac.uk/microarray-as/ae/</a> |
| Glioma                                      | 180               | E-GEOD-4290      | Arrayexpress project: <a href="http://www.ebi.ac.uk/microarray-as/ae/">http://www.ebi.ac.uk/microarray-as/ae/</a> |
| Head and Neck Carcinoma                     | 47                | E-TABM-302       | Arrayexpress project: <a href="http://www.ebi.ac.uk/microarray-as/ae/">http://www.ebi.ac.uk/microarray-as/ae/</a> |
| Cancer Cell Lines                           | 13                | E-GEOD-10709     | Arrayexpress project: <a href="http://www.ebi.ac.uk/microarray-as/ae/">http://www.ebi.ac.uk/microarray-as/ae/</a> |
| Invasive edge, core thyroid carcinoma       | 18                | E-GEOD-6004      | Arrayexpress project: <a href="http://www.ebi.ac.uk/microarray-as/ae/">http://www.ebi.ac.uk/microarray-as/ae/</a> |
| Breast Tumor, Breast Normal Tissue          | 30                | E-GEOD-5764      | Arrayexpress project: <a href="http://www.ebi.ac.uk/microarray-as/ae/">http://www.ebi.ac.uk/microarray-as/ae/</a> |
| Lung Cancer                                 | 111               | E-GEOD-3141      | Arrayexpress project: <a href="http://www.ebi.ac.uk/microarray-as/ae/">http://www.ebi.ac.uk/microarray-as/ae/</a> |
| Melanoma                                    | 87                | E-GEOD-7553      | Arrayexpress project: <a href="http://www.ebi.ac.uk/microarray-as/ae/">http://www.ebi.ac.uk/microarray-as/ae/</a> |
| MSC                                         | 13                | E-GEOD-9593      | Arrayexpress project: <a href="http://www.ebi.ac.uk/microarray-as/ae/">http://www.ebi.ac.uk/microarray-as/ae/</a> |
| MSC                                         | 30                | E-GEOD-7637      | Arrayexpress project: <a href="http://www.ebi.ac.uk/microarray-as/ae/">http://www.ebi.ac.uk/microarray-as/ae/</a> |
| MSCs                                        | 18                | E-MEXP-563       | Arrayexpress project: <a href="http://www.ebi.ac.uk/microarray-as/ae/">http://www.ebi.ac.uk/microarray-as/ae/</a> |
| Ovarian Cancer                              | 27                | E-MEXP-935       | Arrayexpress project: <a href="http://www.ebi.ac.uk/microarray-as/ae/">http://www.ebi.ac.uk/microarray-as/ae/</a> |
| pediatrix tumor                             | 12                | E-GEOD-8596      | Arrayexpress project: <a href="http://www.ebi.ac.uk/microarray-as/ae/">http://www.ebi.ac.uk/microarray-as/ae/</a> |
| Stromal samples from Carcinoma              | 22                | E-GEOD-8977      | Arrayexpress project: <a href="http://www.ebi.ac.uk/microarray-as/ae/">http://www.ebi.ac.uk/microarray-as/ae/</a> |
| Tumor Collection from IGC and expO archive: | 1973              | E-GEOD-2109      | IGC and ExpO project: <a href="https://expo.intgen.org/geo/home.do">https://expo.intgen.org/geo/home.do</a>       |
| including                                   | breast            |                  |                                                                                                                   |
|                                             | lung              |                  |                                                                                                                   |
|                                             | brain             |                  |                                                                                                                   |
|                                             | bladder           |                  |                                                                                                                   |
|                                             | prostate          |                  |                                                                                                                   |
|                                             | pancreas          |                  |                                                                                                                   |
|                                             | liver             |                  |                                                                                                                   |
|                                             | kidney            |                  |                                                                                                                   |
|                                             | ovary             |                  |                                                                                                                   |
|                                             | endometrium       |                  |                                                                                                                   |
|                                             | others            |                  |                                                                                                                   |
