# Supplementary material for: Mesenchymal/Stromal Gene Expression Signature Relates to Basal-Like Breast Cancers, Identifies Bone Metastasis and Predicts Resistance to Therapies
Source: PubMed Central journal article supplement (PMC2994727; doi:10.1371/journal.pone.0014131), 2010-11-30
Supplement: pone.0014131.s004.pdf [file pone.0014131.s004.pdf]

## A

*Ptgs2* values higher than 4-fold the *Ptgs2* median value across the samples:

| Histotype              | Total number of samples | Number of samples with <i>ptgs2</i> value > 3xwhole-genome-median within each dataset | Percentage fraction |
|------------------------|-------------------------|---------------------------------------------------------------------------------------|---------------------|
| Breast                 | 508                     | 10                                                                                    | 1.97                |
| Sarcomas               | 57                      | 4                                                                                     | 7.02                |
| Stroma                 | 34                      | 31                                                                                    | 91.18               |
| MSC                    | 73                      | 57                                                                                    | 78.08               |
| Lung                   | 233                     | 69                                                                                    | 29.61               |
| Brain                  | 135                     | 11                                                                                    | 8.15                |
| Bladder                | 44                      | 18                                                                                    | 40.91               |
| Lymphoma               | 21                      | 2                                                                                     | 9.52                |
| prostate               | 80                      | 35                                                                                    | 43.75               |
| pancreas               | 19                      | 4                                                                                     | 21.05               |
| liver                  | 43                      | 2                                                                                     | 4.65                |
| gastrointestinal tract | 41                      | 4                                                                                     | 9.76                |
| Kidney                 | 264                     | 9                                                                                     | 3.41                |
| ovary                  | 223                     | 7                                                                                     | 3.14                |
| endometrium            | 69                      | 1                                                                                     | 1.45                |
| melanoma               | 68                      | 15                                                                                    | 22.06               |
| others                 | 967                     | 167                                                                                   | 17.27               |

## B

*Ptgs2* values higher than 3-fold the whole-genome median value within the dataset of each sample:

| Histotype                     | Total number of samples | Number of samples with <i>ptgs2</i> value > 3xwhole-genome-median within each dataset | Percentage fraction |
|-------------------------------|-------------------------|---------------------------------------------------------------------------------------|---------------------|
| Breast                        | 508                     | 25                                                                                    | 4.92                |
| Sarcomas                      | 57                      | 5                                                                                     | 8.77                |
| Stroma                        | 34                      | 33                                                                                    | 97.06               |
| MSC                           | 73                      | 43                                                                                    | 58.90               |
| Lung                          | 233                     | 75                                                                                    | 32.19               |
| Brain                         | 135                     | 31                                                                                    | 22.96               |
| Bladder                       | 44                      | 25                                                                                    | 56.82               |
| <b>Lymphoma</b>               | 21                      | 2                                                                                     | 9.52                |
| <b>prostate</b>               | 80                      | 37                                                                                    | 46.25               |
| <b>pancreas</b>               | 19                      | 2                                                                                     | 10.53               |
| <b>liver</b>                  | 43                      | 2                                                                                     | 4.65                |
| <b>gastrointestinal tract</b> | 41                      | 32                                                                                    | 78.05               |
| <b>Kidney</b>                 | 264                     | 9                                                                                     | 3.41                |
| <b>ovary</b>                  | 223                     | 15                                                                                    | 6.73                |
| <b>endometrium</b>            | 69                      | 1                                                                                     | 1.45                |
| <b>melanoma</b>               | 68                      | 20                                                                                    | 29.41               |
| <b>others</b>                 | 967                     | 170                                                                                   | 17.58               |
