# Supplementary material for: Mesenchymal/Stromal Gene Expression Signature Relates to Basal-Like Breast Cancers, Identifies Bone Metastasis and Predicts Resistance to Therapies
Source: PubMed Central journal article supplement (PMC2994727; doi:10.1371/journal.pone.0014131), 2010-11-30
Supplement: pone.0014131.s005.pdf [file pone.0014131.s005.pdf]

## 1. A17-Angiogenesis Signature

| A17 OVEREXPRESSED GENES ( $\geq$ MEDIAN VALUE=0.355) |           |           |                                                                                              |                      | HUMAN ORTHOLOGS |         |
|------------------------------------------------------|-----------|-----------|----------------------------------------------------------------------------------------------|----------------------|-----------------|---------|
| GENE SYMBOL                                          | UNIGENE   | REFSEQ    | GENE DESCRIPTION                                                                             | A17 EXPRESSION VALUE | GENE SYMBOL     | GENE ID |
| Adamts8                                              | Mm.100582 | NM_013906 | A disintegrin-like and metalloprotease (reprolysin type) with thrombospondin type 1 motif, 8 | 0.73                 | ADAMTS8         | 11095   |
| Rnase4                                               | Mm.202665 | NM_007447 | Ribonuclease, RNase A family 4                                                               | 0.79                 | RNASE4          | 6038    |
| Cdh5                                                 | Mm.21767  | NM_009868 | Cadherin 5                                                                                   | 0.65                 | CDH5            | 1003    |
| Chga                                                 | Mm.4137   | NM_007693 | Chromogranin A                                                                               | 0.43                 | CHGA            | 1113    |
| Ctgf                                                 | Mm.1810   | NM_010217 | Connective tissue growth factor                                                              | 1.03                 | CTGF            | 1490    |
| Efnb2                                                | Mm.209813 | NM_010111 | RIKEN cDNA E230020D15 gene                                                                   | 0.4                  | EFNB2           | 1948    |
| Eng                                                  | Mm.225297 | NM_007932 | Endoglin                                                                                     | 0.36                 | ENG             | 2022    |
| Ephb4                                                | Mm.34533  | NM_010144 | Eph receptor B4                                                                              | 0.49                 | EPHB4           | 2050    |
| Fgf16                                                | Mm.154768 | NM_030614 | Fibroblast growth factor 16                                                                  | 0.45                 | FGF16           | 8823    |
| Fgf7                                                 | Mm.330557 | NM_008008 | Fibroblast growth factor 7                                                                   | 0.59                 | FGF7            | 2252    |
| Fgfr1                                                | Mm.265716 | NM_010206 | Fibroblast growth factor receptor 1                                                          | 1.03                 | FGFR1           | 2260    |
| Flt1                                                 | Mm.3464   | NM_010228 | FMS-like tyrosine kinase 1                                                                   | 0.82                 | FLT1            | 2321    |
| Fn1                                                  | Mm.193099 | NM_010233 | Fibronectin 1                                                                                | 0.95                 | FN1             | 2335    |
| Cxcl1                                                | Mm.21013  | NM_008176 | Chemokine (C-X-C motif) ligand 1                                                             | 0.36                 | CXCL1           | 2919    |
| Hgf                                                  | Mm.267078 | NM_010427 | Hepatocyte growth factor                                                                     | 0.57                 | HGF             | 3082    |
| Hif1a                                                | Mm.3879   | NM_010431 | Hypoxia inducible factor 1, alpha subunit                                                    | 0.9                  | HIF1A           | 3091    |
| Igf1                                                 | Mm.268521 | NM_010512 | Insulin-like growth factor 1                                                                 | 0.58                 | IGF1            | 3479    |
| Itga5                                                | Mm.16234  | NM_010577 | Integrin alpha 5 (fibronectin receptor alpha)                                                | 0.55                 | ITGA5           | 3678    |
| Mmp2                                                 | Mm.29564  | NM_008610 | Matrix metalloproteinase 2                                                                   | 0.56                 | MMP2            | 4313    |
| Msr1                                                 | Mm.239291 | NM_031195 | Macrophage scavenger receptor 1                                                              | 0.91                 | MSR1            | 4481    |
| Nos3                                                 | Mm.258415 | NM_008713 | Nitric oxide synthase 3, endothelial cell                                                    | 0.49                 | NOS3            | 4846    |
| Pdgfra                                               | Mm.221403 | NM_011058 | Platelet derived growth factor receptor, alpha polypeptide                                   | 0.52                 | PDGFRA          | 5156    |
| Pdgfrb                                               | Mm.4146   | NM_008809 | Platelet derived growth factor receptor, beta polypeptide                                    | 0.4                  | PDGFRB          | 5159    |
| Pecam1                                               | Mm.343951 | NM_008816 | Platelet/endothelial cell adhesion molecule                                                  | 0.45                 | PECAM1          | 5175    |
| Plau                                                 | Mm.4183   | NM_008873 | Plasminogen activator, urokinase                                                             | 0.37                 | PLAU            | 5328    |
| Ptgs1                                                | Mm.275434 | NM_008969 | Prostaglandin-endoperoxide synthase 1                                                        | 0.36                 | PTGS1           | 5742    |
| Ptgs2                                                | Mm.292547 | NM_011198 | Prostaglandin-endoperoxide synthase 2                                                        | 0.68                 | PTGS2           | 5743    |
| Rsn                                                  | Mm.241109 | NM_019765 | Restin (Reed-Steinberg cell-expressed intermediate filament-associated protein)              | 0.37                 | CLIP1           | 6249    |
| Serpine1                                             | Mm.250422 | NM_008871 | Serine (or cysteine) proteinase inhibitor, clade E, member 1                                 | 0.39                 | SERPINE1        | 5054    |
| Serpib2                                              | Mm.271870 | NM_011111 | Serine (or cysteine) proteinase inhibitor, clade B, member 2                                 | 0.47                 | SERPINB2        | 5055    |
| Serpinf1                                             | Mm.2044   | NM_011340 | Serine (or cysteine) proteinase inhibitor, clade F, member 1                                 | 0.76                 | SERPINF1        | 5176    |
| Sparc                                                | Mm.291442 | NM_009242 | Secreted acidic cysteine rich glycoprotein                                                   | 0.76                 | SPARC           | 6678    |
| Spp1                                                 | Mm.288474 | NM_009263 | Secreted phosphoprotein 1                                                                    | 0.84                 | SPP1            | 6696    |
| Tek                                                  | Mm.14313  | NM_013690 | Endothelial-specific receptor tyrosine kinase                                                | 0.72                 | TEK             | 7010    |
| Tgfa                                                 | Mm.137222 | NM_031199 | Transforming growth factor alpha                                                             | 0.5                  | TGFA            | 7039    |
| Tgfb3                                                | Mm.307887 | NM_009368 | Transforming growth factor, beta 3                                                           | 0.82                 | TGFB3           | 7043    |
| Tgfb1                                                | Mm.197552 | NM_009370 | Transforming growth factor, beta receptor I                                                  | 0.63                 | TGFBR1          | 7046    |
| Tgfb2                                                | Mm.172346 | NM_009371 | Transforming growth factor, beta receptor II                                                 | 0.44                 | TGFBR2          | 7048    |

|       |           |           |                                          |      |        |      |
|-------|-----------|-----------|------------------------------------------|------|--------|------|
| Tgfr3 | Mm.200775 | NM_011578 | Similar to Ornithine decarboxylase (ODC) | 0.38 | TGFBR3 | 7049 |
| Thbs1 | Mm.4159   | NM_011580 | Thrombospondin 1                         | 0.89 | THBS1  | 7057 |
| Thbs2 | Mm.26688  | NM_011581 | Thrombospondin 2                         | 0.75 | THBS2  | 7058 |
| Thbs3 | Mm.2114   | NM_013691 | Thrombospondin 3                         | 0.48 | THBS3  | 7059 |
| Timp1 | Mm.8245   | NM_011593 | Tissue inhibitor of metalloproteinase 1  | 0.77 | TIMP1  | 7076 |
| Timp2 | Mm.206505 | NM_011594 | Tissue inhibitor of metalloproteinase 2  | 0.82 | TIMP2  | 7077 |
| Vcam1 | Mm.76649  | NM_011693 | Vascular cell adhesion molecule 1        | 0.84 | VCAM1  | 7412 |
| Vegfa | Mm.282184 | NM_009505 | Vascular endothelial growth factor A     | 0.37 | VEGFA  | 7422 |
| Vegfb | Mm.15607  | NM_011697 | Vascular endothelial growth factor B     | 0.38 | VEGFB  | 7423 |
| Vegfc | Mm.1402   | NM_009506 | Vascular endothelial growth factor C     | 0.52 | VEGFC  | 7424 |

## 2. A17-Stemness Signature

| A17 OVEREXPRESSED GENES ( $\geq$ MEDIAN VALUE=0.27) |           |           |                                                                        |                      |             | HUMAN ORTHOLOGS |  |
|-----------------------------------------------------|-----------|-----------|------------------------------------------------------------------------|----------------------|-------------|-----------------|--|
| GENE SYMBOL                                         | UNIGENE   | REFSEQ    | GENE DESCRIPTION                                                       | A17 EXPRESSION VALUE | GENE SYMBOL | GENE ID         |  |
| Abcg2                                               | Mm.333096 | NM_011920 | ATP-binding cassette, sub-family G (WHITE), member 2                   | 0.31                 | ABCG2       | 9429            |  |
| Acta2                                               | Mm.213025 | NM_007392 | Actin, alpha 2, smooth muscle, aorta                                   | 0.99                 | ACTA2       | 59              |  |
| Actc1                                               | Mm.686    | NM_009608 | Actin, alpha, cardiac                                                  | 0.51                 | ACTC1       | 70              |  |
| Actg2                                               | Mm.292865 | NM_009610 | Actin, gamma 2, smooth muscle, enteric                                 | 0.99                 | ACTG2       | 72              |  |
| Acvr1                                               | Mm.689    | NM_007394 | Activin A receptor, type 1                                             | 0.29                 | ACVR1       | 90              |  |
| Acvr2                                               | Mm.314338 | NM_007396 | Activin receptor IIA                                                   | 0.49                 | ACVR2A      | 92              |  |
| Nppa                                                | Mm.19961  | NM_008725 | Natriuretic peptide precursor type A                                   | 0.38                 | NPPA        | 4878            |  |
| Bdnf                                                | Mm.1442   | NM_007540 | Brain derived neurotrophic factor                                      | 0.30                 | BDNF        | 627             |  |
| Bmp1                                                | Mm.27757  | NM_009755 | Bone morphogenetic protein 1                                           | 0.45                 | BMP1        | 649             |  |
| Bmp10                                               | Mm.57171  | NM_009756 | Bone morphogenetic protein 10                                          | 0.30                 | BMP10       | 27302           |  |
| Bmp2                                                | Mm.103205 | NM_007553 | Bone morphogenetic protein 2                                           | 0.32                 | BMP2        | 650             |  |
| Bmp3                                                | Mm.209571 | NM_173404 | Bone morphogenetic protein 3                                           | 1.09                 | BMP3        | 651             |  |
| Bmp4                                                | Mm.6813   | NM_007554 | Bone morphogenetic protein 4                                           | 0.41                 | BMP4        | 652             |  |
| Bmp6                                                | Mm.374781 | NM_007556 | Bone morphogenetic protein 6                                           | 0.79                 | BMP6        | 654             |  |
| Bmp8a                                               | Mm.318417 | NM_007558 | Bone morphogenetic protein 8a                                          | 0.38                 | BMP8A       | 353500          |  |
| Bmpr1a                                              | Mm.237825 | NM_009758 | Bone morphogenetic protein receptor, type 1A                           | 0.70                 | BMPR1A      | 657             |  |
| Bmpr1b                                              | Mm.39089  | NM_007560 | Bone morphogenetic protein receptor, type 1B                           | 0.33                 | BMPR1B      | 658             |  |
| Bmpr2                                               | Mm.7106   | NM_007561 | Bone morphogenetic protein receptor, type II (serine/threonine kinase) | 0.70                 | BMPR2       | 659             |  |
| Ctnna1                                              | Mm.18962  | NM_009818 | Catenin (cadherin associated protein), alpha 1                         | 0.83                 | CTNNA1      | 1495            |  |
| Catna2                                              | Mm.34637  | NM_009819 | Catenin (cadherin associated protein), alpha 2                         | 0.45                 | CTNNA2      | 1496            |  |
| Catnal1                                             | Mm.218891 | NM_018761 | Catenin (cadherin associated protein), alpha-like 1                    | 0.59                 | CTNNAL1     | 8727            |  |
| Ctnnb1                                              | Mm.291928 | NM_007614 | Catenin (cadherin associated protein), beta 1                          | 0.79                 | CTNNB1      | 1499            |  |
| Catnd2                                              | Mm.321648 | NM_008729 | Catenin (cadherin associated protein), delta 2                         | 0.51                 | CTNND2      | 1501            |  |
| Ccng2                                               | Mm.3527   | NM_007635 | Cyclin G2                                                              | 0.30                 | CCNG2       | 901             |  |
| Cd34                                                | Mm.29798  | NM_133654 | CD34 antigen                                                           | 0.34                 | CD34        | 947             |  |
| Cd44                                                | Mm.330428 | M27130    | CD44 antigen                                                           | 0.61                 | CD44        | 960             |  |
| Cdh15                                               | Mm.1976   | NM_007662 | Cadherin 15                                                            | 0.38                 | CDH15       | 1013            |  |
| Cdh2                                                | Mm.257437 | NM_007664 | Cadherin 2                                                             | 0.34                 | CDH2        | 1000            |  |

|         |           |              |                                                                   |      |         |       |
|---------|-----------|--------------|-------------------------------------------------------------------|------|---------|-------|
| Cdh3    | Mm.4658   | NM_001037809 | Cadherin 3                                                        | 0.35 | CDH3    | 1001  |
| Cdh5    | Mm.21767  | NM_009868    | Cadherin 5                                                        | 0.89 | CDH5    | 1003  |
| Cdkn1a  | Mm.195663 | NM_007669    | Cyclin-dependent kinase inhibitor 1A (P21)                        | 0.78 | CDKN1A  | 1026  |
| Cdkn1b  | Mm.2958   | NM_009875    | Cyclin-dependent kinase inhibitor 1B (P27)                        | 0.29 | CDKN1B  | 1027  |
| Cer1    | Mm.6780   | NM_009887    | Cerberus 1 homolog (Xenopus laevis)                               | 0.32 | CER1    | 9350  |
| Cnp1    | Mm.15711  | NM_009923    | Cyclic nucleotide phosphodiesterase 1                             | 1.07 | CNP     | 1267  |
| Zfp91   | Mm.290924 | XM_909506    | Zinc finger protein 91                                            | 1.04 | ZFP91   | 80829 |
| Cntfr   | Mm.272210 | NM_016673    | Ciliary neurotrophic factor receptor                              | 0.33 | CNTFR   | 1271  |
| Col6a2  | Mm.1949   | NM_146007    | Procollagen, type VI, alpha 2                                     | 0.93 | COL6A2  | 12834 |
| Cst3    | Mm.4263   | NM_009976    | Cystatin C                                                        | 0.53 | CST3    | 1471  |
| Dnmt1   | Mm.128580 | NM_010066    | DNA methyltransferase (cytosine-5) 1                              | 0.76 | DNMT1   | 1786  |
| Egfr    | Mm.8534   | NM_007912    | Epidermal growth factor receptor                                  | 0.67 | EGFR    | 1956  |
| ErbB2ip | Mm.277354 | NM_021563    | ErbB2 interacting protein                                         | 0.73 | ERBB2IP | 55914 |
| ErbB3   | Mm.29023  | NM_010153    | V-erb-b2 erythroblastic leukemia viral oncogene homolog 3 (avian) | 0.75 | ERBB3   | 2065  |
| ErbB4   | Mm.336982 | XM_136682    | V-erb-a erythroblastic leukemia viral oncogene homolog 4 (avian)  | 0.42 | ERBB4   | 2066  |
| Fabp4   | Mm.582    | NM_024406    | Fatty acid binding protein 4, adipocyte                           | 0.28 | FABP4   | 2167  |
| Fgf20   | Mm.376109 | NM_030610    | Fibroblast growth factor 20                                       | 0.34 | FGF20   | 26281 |
| Fgf22   | Mm.154211 | NM_023304    | Fibroblast growth factor 22                                       | 0.69 | FGF22   | 27006 |
| Fgf23   | Mm.347933 | NM_022657    | Fibroblast growth factor 23                                       | 0.71 | FGF23   | 8074  |
| Fgf3    | Mm.4947   | NM_008007    | Fibroblast growth factor 3                                        | 1.05 | FGF3    | 2248  |
| Fgf4    | Mm.4956   | NM_010202    | Fibroblast growth factor 4                                        | 0.27 | FGF4    | 2249  |
| Fgf5    | Mm.5055   | NM_010203    | Fibroblast growth factor 5                                        | 0.97 | FGF5    | 2250  |
| Fgfr1   | Mm.265716 | NM_010206    | Fibroblast growth factor receptor 1                               | 0.83 | FGFR1   | 2260  |
| Foxm1   | Mm.42148  | NM_008021    | Forkhead box M1                                                   | 0.45 | FOXM1   | 2305  |
| Foxo1   | Mm.29891  | NM_019739    | Forkhead box O1                                                   | 0.44 | FOXO1   | 2308  |
| Fzd1    | Mm.246003 | NM_021457    | Frizzled homolog 1 (Drosophila)                                   | 0.84 | FZD1    | 8321  |
| Fzd7    | Mm.297906 | NM_008057    | Frizzled homolog 7 (Drosophila)                                   | 0.35 | FZD7    | 8324  |
| Fzd8    | Mm.184289 | NM_008058    | Frizzled homolog 8 (Drosophila)                                   | 0.76 | FZD8    | 8325  |
| Gdf1    | Mm.258280 | NM_008107    | Growth differentiation factor 1                                   | 0.46 | GDF1    | 2657  |
| Gdf5    | Mm.4744   | NM_008109    | Growth differentiation factor 5                                   | 0.30 | GDF5    | 8200  |
| Gdf8    | Mm.3514   | NM_010834    | Growth differentiation factor 8                                   | 0.28 | GDF8    | 2660  |
| Gdf9    | Mm.9714   | NM_008110    | Growth differentiation factor 9                                   | 0.56 | GDF9    | 2661  |
| Gjb1    | Mm.21198  | NM_008124    | Gap junction membrane channel protein beta 1                      | 0.58 | GJB1    | 2705  |
| Gjb5    | Mm.26859  | NM_010291    | Gap junction membrane channel protein beta 5                      | 0.53 | GJB5    | 2709  |
| Icam5   | Mm.4629   | NM_008319    | Intercellular adhesion molecule 5, telencephalin                  | 0.60 | ICAM5   | 7087  |
| Igf1r   | Mm.275742 | NM_010513    | Insulin-like growth factor I receptor                             | 0.64 | IGF1R   | 3480  |
| Igf2r   | Mm.26553  | NM_010515    | Insulin-like growth factor 2 receptor                             | 0.28 | IGF2R   | 3482  |
| Igfbp3  | Mm.29254  | NM_008343    | Insulin-like growth factor binding protein 3                      | 0.32 | IGFBP3  | 3486  |
| Il6     | Mm.1019   | NM_031168    | Interleukin 6                                                     | 0.92 | IL6     | 3569  |
| Il6ra   | Mm.2856   | NM_010559    | Interleukin 6 receptor, alpha                                     | 0.30 | IL6R    | 3570  |
| Il6st   | Mm.4364   | NM_010560    | Interleukin 6 signal transducer                                   | 0.91 | IL6ST   | 3572  |
| Ina     | Mm.276251 | NM_146100    | Internexin neuronal intermediate filament protein, alpha          | 0.27 | INA     | 9118  |

|               |           |           |                                                               |      |        |        |
|---------------|-----------|-----------|---------------------------------------------------------------|------|--------|--------|
| Inhba         | Mm.8042   | NM_008380 | Inhibin beta-A                                                | 0.65 | INHBA  | 3624   |
| Inhbb         | Mm.3092   | NM_008381 | Inhibin beta-B                                                | 0.78 | INHBB  | 3625   |
| Isl1          | Mm.42242  | NM_021459 | ISL1 transcription factor, LIM/homeodomain (islet 1)          | 0.50 | ISL1   | 3670   |
| Itga5         | Mm.16234  | NM_010577 | Integrin alpha 5 (fibronectin receptor alpha)                 | 0.51 | ITGA5  | 3678   |
| Itga6         | Mm.225096 | NM_008397 | Integrin alpha 6                                              | 0.34 | ITGA6  | 3655   |
| Itga7         | Mm.179747 | NM_008398 | Integrin alpha 7                                              | 0.66 | ITGA7  | 3679   |
| Itgae         | Mm.96     | NM_008399 | Integrin, alpha E, epithelial-associated                      | 0.42 | ITGAE  | 3682   |
| Itgam         | Mm.262106 | NM_008401 | Integrin alpha M                                              | 0.28 | ITGAM  | 3684   |
| Itgav         | Mm.227    | NM_008402 | Integrin alpha V                                              | 0.77 | ITGAV  | 3685   |
| Itgax         | Mm.22378  | NM_021334 | Integrin alpha X                                              | 0.43 | ITGAX  | 3687   |
| Itgb1         | Mm.263396 | NM_010578 | Integrin beta 1 (fibronectin receptor beta)                   | 0.79 | ITGB1  | 3688   |
| Itgb4         | Mm.213873 | L04678    | Integrin beta 4                                               | 0.59 | ITGB4  | 3691   |
| Itgb5         | Mm.6424   | NM_010580 | Integrin beta 5                                               | 1.03 | ITGB5  | 3693   |
| Itgb7         | Mm.58     | NM_013566 | Integrin beta 7                                               | 0.27 | ITGB7  | 3695   |
| F11r          | Mm.294882 | NM_172647 | F11 receptor                                                  | 0.37 | F11R   | 50848  |
| Krt1-14       | Mm.6974   | NM_016958 | Keratin complex 1, acidic, gene 14                            | 0.31 | KRT14  | 3861   |
| Krt1-15       | Mm.38498  | NM_008469 | Keratin complex 1, acidic, gene 15                            | 0.55 | KRT15  | 3866   |
| Krt1-5        | Mm.306829 | XM_894886 | Keratin complex 1, acidic, gene 5                             | 0.46 | KRT5   | 3852   |
| Krt2-8        | Mm.289759 | NM_031170 | Keratin complex 2, basic, gene 8                              | 0.45 | KRT8   | 3856   |
| Lif           | Mm.4964   | NM_008501 | Leukemia inhibitory factor                                    | 0.29 | LIF    | 3976   |
| Myh6          | Mm.290003 | NM_010856 | Myosin, heavy polypeptide 6, cardiac muscle, alpha            | 0.60 | MYH6   | 4624   |
| Myl4          | Mm.247636 | NM_010858 | Myosin, light polypeptide 4                                   | 0.66 | MYL4   | 4635   |
| Ncam1         | Mm.4974   | NM_010875 | Neural cell adhesion molecule 1                               | 0.51 | NCAM1  | 4684   |
| Nes           | Mm.331129 | NM_016701 | Nestin                                                        | 0.49 | NES    | 10763  |
| Nefl          | Mm.1956   | NM_010910 | Neurofilament, light polypeptide                              | 0.32 | NEFL   | 4747   |
| Ngfb          | Mm.1259   | NM_013609 | Nerve growth factor, beta                                     | 1.06 | NGFB   | 4803   |
| Ngfr          | Mm.283893 | NM_033217 | Nerve growth factor receptor (TNFR superfamily, member 16)    | 0.31 | NGFR   | 4804   |
| Nkx2-2        | Mm.330639 | NM_010919 | NK2 transcription factor related, locus 2 (Drosophila)        | 0.99 | NKX2-2 | 4821   |
| Nkx2-5        | Mm.41974  | NM_008700 | NK2 transcription factor related, locus 5 (Drosophila)        | 0.30 | NKX2-5 | 1482   |
| Nodal         | Mm.57195  | NM_013611 | Nodal                                                         | 0.41 | NODAL  | 4838   |
| Notch3        | Mm.4945   | NM_008716 | Notch gene homolog 3 (Drosophila)                             | 0.34 | NOTCH3 | 4854   |
| Notch4        | Mm.173813 | NM_010929 | Notch gene homolog 4 (Drosophila)                             | 0.85 | NOTCH4 | 4855   |
| A830055N07Rik | Mm.255566 | NM_008734 | RIKEN cDNA A830055N07 gene                                    | 0.28 | NRG3   | 10718  |
| Ntrk3         | Mm.33496  | NM_008746 | Neurotrophic tyrosine kinase, receptor, type 3                | 0.42 | NTRK3  | 4916   |
| Numb          | Mm.4390   | NM_010949 | Numb gene homolog (Drosophila)                                | 0.31 | NUMB   | 8650   |
| Olig1         | Mm.39300  | NM_016968 | Oligodendrocyte transcription factor 1                        | 0.88 | OLIG1  | 116448 |
| Pdgfb         | Mm.144089 | NM_011057 | Platelet derived growth factor, B polypeptide                 | 0.35 | PDGFB  | 5155   |
| Pou3f2        | Mm.129387 | NM_008899 | POU domain, class 3, transcription factor 2                   | 1.07 | POU3F2 | 5454   |
| Pou3f3        | Mm.40572  | NM_008900 | POU domain, class 3, transcription factor 3                   | 0.96 | POU3F3 | 5455   |
| Pou5f1        | Mm.17031  | NM_013633 | POU domain, class 5, transcription factor 1                   | 0.32 | POU5F1 | 5460   |
| Pou6f1        | Mm.28825  | NM_010127 | POU domain, class 6, transcription factor 1                   | 0.27 | POU6F1 | 5463   |
| Grem2         | Mm.25760  | NM_011825 | Gremlin 2 homolog, cysteine knot superfamily (Xenopus laevis) | 0.34 | GREM2  | 64388  |

|        |           |           |                                                                     |      |            |        |
|--------|-----------|-----------|---------------------------------------------------------------------|------|------------|--------|
| Ptch1  | Mm.228798 | NM_008957 | Patched homolog 1                                                   | 0.70 | PTCH1      | 5727   |
| Pten   | Mm.245395 | NM_008960 | Phosphatase and tensin homolog                                      | 0.78 | PTEN       | 5728   |
| S100b  | Mm.235998 | NM_009115 | S100 protein, beta polypeptide, neural                              | 0.70 | S100B      | 6285   |
| Shh    | Mm.57202  | NM_009170 | Sonic hedgehog                                                      | 0.61 | SHH        | 6469   |
| Slc2a1 | Mm.21002  | NM_011400 | Solute carrier family 2 (facilitated glucose transporter), member 1 | 0.68 | SLC2A1     | 6513   |
| Snai1  | Mm.2093   | NM_011427 | Snail homolog 1 (Drosophila)                                        | 0.33 | SNAI1      | 6615   |
| Snai2  | Mm.4272   | NM_011415 | Snail homolog 2 (Drosophila)                                        | 0.57 | SNAI2      | 6591   |
| Sox1   | Mm.39088  | NM_009233 | SRY-box containing gene 1                                           | 0.82 | SOX1       | 6656   |
| Sox3   | Mm.35784  | NM_009237 | SRY-box containing gene 3                                           | 0.68 | SOX3       | 6658   |
| Sox4   | Mm.240627 | NM_009238 | SRY-box containing gene 4                                           | 0.57 | SOX4       | 6659   |
| Tebp   | Mm.305816 | NM_019766 | Prostaglandin E synthase 3 (cytosolic)                              | 0.81 | TEBP       | 7080   |
| Tep1   | Mm.318736 | NM_009351 | Telomerase associated protein 1                                     | 0.42 | TEP1       | 7011   |
| Terf1  | Mm.4306   | NM_009352 | Telomeric repeat binding factor 1                                   | 0.30 | TERF1      | 7013   |
| Tgfb3  | Mm.3992   | NM_009368 | Transforming growth factor, beta 3                                  | 0.39 | TGFB3      | 7043   |
| Tgfr1  | Mm.197552 | NM_009370 | Transforming growth factor, beta receptor I                         | 0.47 | TGFBR1     | 7046   |
| Tgfr2  | Mm.172346 | NM_009371 | Transforming growth factor, beta receptor II                        | 0.37 | TGFBR2     | 7048   |
| Vcam1  | Mm.76649  | NM_011693 | Vascular cell adhesion molecule 1                                   | 0.43 | VCAM1      | 7412   |
| Vegfa  | Mm.282184 | NM_009505 | Vascular endothelial growth factor A                                | 0.43 | VEGFA      | 7422   |
| Vim    | Mm.268000 | NM_011701 | Vimentin                                                            | 0.34 | VIM        | 7431   |
| Zfp110 | Mm.292297 | NM_022981 | Zinc finger protein 110                                             | 0.56 | ZFP91-CNTF | 386607 |

### 3. A17-Signal Transduction Signature

| A17 OVEREXPRESSED GENES ( $\geq$ MEDIAN VALUE=0.27) |           |           |                                                           |                      |             | HUMAN ORTHOLOGS |  |
|-----------------------------------------------------|-----------|-----------|-----------------------------------------------------------|----------------------|-------------|-----------------|--|
| GENE SYMBOL                                         | UNIGENE   | REFSEQ    | GENE DESCRIPTION                                          | A17 EXPRESSION VALUE | GENE SYMBOL | GENE ID         |  |
| Atf2                                                | Mm.209903 | NM_009715 | Activating transcription factor 2                         | 0.28                 | ATF2        | 1386            |  |
| Bcl2                                                | Mm.257460 | NM_009741 | B-cell leukemia/lymphoma 2                                | 0.83                 | BCL2        | 596             |  |
| Birc2                                               | Mm.335659 | NM_007465 | Baculoviral IAP repeat-containing 2                       | 0.36                 | BIRC2       | 329             |  |
| Bmp4                                                | Mm.6813   | NM_007554 | Bone morphogenetic protein 4                              | 0.345                | BMP4        | 652             |  |
| Brc1                                                | Mm.244975 | NM_009764 | Breast cancer 1                                           | 0.355                | BRCA1       | 672             |  |
| Ccnd1                                               | Mm.273049 | NM_007631 | Cyclin D1                                                 | 0.93                 | CCND1       | 595             |  |
| Cdkn1a                                              | Mm.195663 | NM_007669 | Cyclin-dependent kinase inhibitor 1A (P21)                | 0.505                | CDKN1A      | 1026            |  |
| Cdkn1b                                              | Mm.2958   | NM_009875 | Cyclin-dependent kinase inhibitor 1B (P27)                | 0.425                | CDKN1B      | 1027            |  |
| Cdkn2a                                              | Mm.4733   | NM_009877 | Cyclin-dependent kinase inhibitor 2A                      | 0.755                | CDKN2A      | 1029            |  |
| Cdkn2b                                              | Mm.269426 | NM_007670 | Cyclin-dependent kinase inhibitor 2B (p15, inhibits CDK4) | 1.06                 | CDKN2B      | 1030            |  |
| Cdkn2c                                              | Mm.1912   | NM_007671 | Cyclin-dependent kinase inhibitor 2C (p18, inhibits CDK4) | 0.945                | CDKN2C      | 1031            |  |
| Col1a1                                              | Mm.277735 | NM_007742 | Procollagen, type I, alpha 1                              | 0.72                 | COL1A1      | 1277            |  |
| Ctsd                                                | Mm.231395 | NM_009983 | Cathepsin D                                               | 0.68                 | CTSD        | 1509            |  |
| Dusp1                                               | Mm.239041 | NM_013642 | Dual specificity phosphatase 1                            | 0.8                  | DUSP1       | 1843            |  |
| Edn1                                                | Mm.14543  | NM_010104 | Endothelin 1                                              | 0.27                 | EDN1        | 1906            |  |
| Egr1                                                | Mm.181959 | NM_007913 | Early growth response 1                                   | 1.065                | EGR1        | 1958            |  |
| Enpp2                                               | Mm.250256 | NM_015744 | Ectonucleotide pyrophosphatase/phosphodiesterase 2        | 0.335                | ENPP2       | 5168            |  |
| Epo                                                 | Mm.349116 | NM_007942 | Erythropoietin                                            | 0.28                 | EPO         | 2056            |  |

|         |           |           |                                                                     |       |         |       |
|---------|-----------|-----------|---------------------------------------------------------------------|-------|---------|-------|
| Fn1     | Mm.193099 | NM_010233 | Fibronectin 1                                                       | 1.14  | FN1     | 2335  |
| Fos     | Mm.246513 | NM_010234 | FBJ osteosarcoma related oncogene                                   | 0.305 | FOS     | 2353  |
| Fosl1   | Mm.6215   | NM_010235 | Fos-like antigen 1                                                  | 0.51  | FOSL1   | 8061  |
| Gadd45a | Mm.1236   | NM_007836 | Growth arrest and DNA-damage-inducible 45 alpha                     | 0.35  | GADD45A | 1647  |
| Hhip    | Mm.254493 | NM_020259 | Hedgehog-interacting protein                                        | 0.305 | HHIP    | 64399 |
| Hif1a   | Mm.3879   | NM_010431 | Hypoxia inducible factor 1, alpha subunit                           | 0.65  | HIF1A   | 3091  |
| Hk1     | Mm.196605 | NM_010438 | Hexokinase 1                                                        | 0.405 | HK1     | 3098  |
| Hmox1   | Mm.276389 | NM_010442 | Heme oxygenase (decycling) 1                                        | 0.495 | HMOX1   | 3162  |
| Hsf1    | Mm.347444 | NM_008296 | Heat shock factor 1                                                 | 0.295 | HSF1    | 3297  |
| Hspa4   | Mm.239865 | NM_008300 | Heat shock protein 4                                                | 0.715 | HSPA4   | 3308  |
| Hspa5   | Mm.330160 | NM_022310 | Heat shock 70kD protein 5 (glucose-regulated protein)               | 0.735 | HSPA5   | 3309  |
| Hspb2   | Mm.1980   | NM_024441 | Heat shock protein 2                                                | 1.12  | HSPB2   | 3316  |
| Hspca   | Mm.371565 | NM_010480 | Heat shock protein 1, alpha                                         | 0.85  | HSPCA   | 3320  |
| Idb2    | Mm.34871  | NM_010496 | Inhibitor of DNA binding 2                                          | 1.055 | IDB2    | 15902 |
| Il2     | Mm.14190  | NM_008366 | Interleukin 2                                                       | 0.31  | IL2     | 3558  |
| Irf1    | Mm.105218 | NM_008390 | Interferon regulatory factor 1                                      | 0.34  | IRF1    | 3659  |
| Mcl1    | Mm.1639   | NM_008562 | Myeloid cell leukemia sequence 1                                    | 0.565 | MCL1    | 4170  |
| Mdm2    | Mm.22670  | NM_010786 | Transformed mouse 3T3 cell double minute 2                          | 0.29  | MDM2    | 4193  |
| Tmepai  | Mm.73682  | NM_022995 | Transmembrane, prostate androgen induced RNA                        | 0.37  | PMEPA1  | 56937 |
| Nfkb1   | Mm.256765 | NM_008689 | Ubiquitin-conjugating enzyme E2D 3 (UBC4/5 homolog, yeast)          | 0.295 | NFKB1   | 4790  |
| Ptgs2   | Mm.292547 | NM_011198 | Prostaglandin-endoperoxide synthase 2                               | 0.825 | PTGS2   | 5743  |
| Pzp     | Mm.260144 | NM_007376 | Pregnancy zone protein                                              | 0.27  | PZP     | 5858  |
| Slc2a1  | Mm.21002  | NM_011400 | Solute carrier family 2 (facilitated glucose transporter), member 1 | 0.315 | SLC2A1  | 6513  |
| Traf1   | Mm.239514 | NM_009421 | Tnf receptor-associated factor 1                                    | 0.71  | TRAF1   | 7185  |
| Trf     | Mm.37214  | NM_133977 | Transferrin                                                         | 0.31  | TERF1   | 7013  |
| Tfrc    | Mm.28683  | NM_011638 | Transferrin receptor                                                | 0.6   | TFRC    | 7037  |
| Trim25  | Mm.248445 | NM_009546 | Tripartite motif protein 25                                         | 0.625 | TRIM25  | 7706  |
| Trp53   | Mm.222    | NM_011640 | Transformation related protein 53                                   | 0.395 | TRP53   | 7157  |
| Vegfa   | Mm.282184 | NM_009505 | Vascular endothelial growth factor A                                | 0.295 | VEGFA   | 7422  |
| Wnt2    | Mm.33653  | NM_023653 | Wingless-related MMTV integration site 2                            | 0.33  | WNT2    | 7472  |
| Wsb1    | Mm.307022 | NM_019653 | WD repeat and SOCS box-containing 1                                 | 0.585 | WSB1    | 26118 |
