# Supplementary material for: Mesenchymal/Stromal Gene Expression Signature Relates to Basal-Like Breast Cancers, Identifies Bone Metastasis and Predicts Resistance to Therapies
Source: PubMed Central journal article supplement (PMC2994727; doi:10.1371/journal.pone.0014131), 2010-11-30
Supplement: pone.0014131.s006.pdf [file pone.0014131.s006.pdf]

| Accession Number                                                        | Number of samples | Description                                                                                                                                                                                | Reference                                                                                                                                                                                                             |
|-------------------------------------------------------------------------|-------------------|--------------------------------------------------------------------------------------------------------------------------------------------------------------------------------------------|-----------------------------------------------------------------------------------------------------------------------------------------------------------------------------------------------------------------------|
| E-GEOD-8139                                                             | 51                | Transcription profiling of human in vivo xenograft models of estrogen receptor-positive (ER+) breast cancer, with or without HER2 over-expression (MCF7/HER2-18 and MCF7 wt, respectively) | No reference                                                                                                                                                                                                          |
| E-GEOD-8140 : va accoppiato allo 8139: contiene le cellule di controllo | 14                | Transcription profiling of mouse MCF7 wt xenografts                                                                                                                                        | No reference                                                                                                                                                                                                          |
| E-GEOD-8742                                                             | 10                | Transcription profiling of human cell lines MCF7, COLO-205 and SK-MEL-5 following treatment with PEP008                                                                                    | Sarah-Jane Cozzi, Peter G Parsons, Steven M Ogbourne, Julie Pedley, Glen M Boyle. <i>Cancer Res</i> 66(20):10083-91 (2006), <a href="#">PubMed 17047072</a>                                                           |
| E-GEOD-7327                                                             | 7                 | Transcription profiling of human tamoxifen-resistant MCF-7 wild-type murine xenograft tumors with E2-supplemented tumors MCF7 xenografts                                                   | Suleiman Massarweh, C Kent Osborne, Chad J Creighton, Lanfang Qin, Anna Tsimelzon, Shixia Huang, Heidi Weiss, Mothaffar Rimawi, Rachel Schiff. <i>Cancer Res</i> 68(3):826-33 (2008), <a href="#">PubMed 18245484</a> |
| E-GEOD-10879                                                            | 11                | Transcription profiling of human hormone-responsive MCF-7 cells versus estrogen-deprived MCF-7:5C and MCF-7:2A breast cancer cells                                                         | No reference                                                                                                                                                                                                          |
